# Supplementary material for: De novo amyloid peptides with subtle sequence variations differ in their self-assembly and nanomechanical properties
Source: Royal Society of Chemistry journal article supplement (doi:10.1039/d3sm00604b), 2023-01-01

# Electronic Supplementary Information

## ***De novo* amyloid peptides with subtle sequence variations differ in their self-assembly and nanomechanical properties**

Hannah G. Abernathy,<sup>1†</sup> Jhinuk Saha,<sup>2†</sup> Lisa K. Kemp,<sup>1</sup> Parvesh Wadhvani,<sup>4</sup> Tristan D. Clemons,<sup>1</sup> Sarah E. Morgan,<sup>1\*</sup> and Vijayaraghavan Rangachari<sup>2,3\*</sup>

<sup>1</sup>School of Polymer Science & Engineering and <sup>2</sup>Department of Chemistry and Biochemistry, School of Mathematics and Natural Sciences, and <sup>3</sup>Center for Molecular and Cellular Biosciences, University of Southern Mississippi, Hattiesburg, MS,

<sup>4</sup>Department of Molecular Biophysics (IBG 2), Karlsruhe Institute of Technology (KIT), Hermann-von-Helmholtz-Platz 1, 76344, Karlsruhe, Germany.

**Fig S1.** Scheme of decapeptide synthesis via solid phase peptide synthesis followed by cleavage from Wang resin, and deprotection of amino acids.

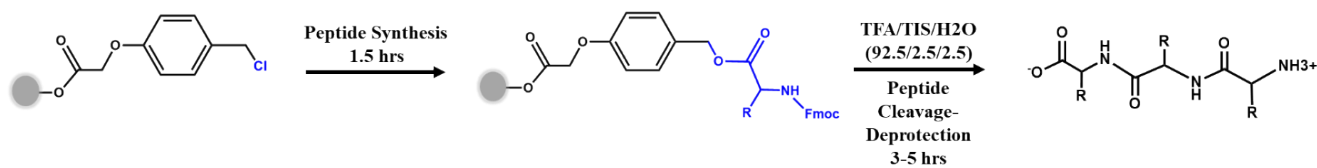

**Fig S2.** Structures of decapeptide positive (DP (+)) and negative (DP (-)) controls.

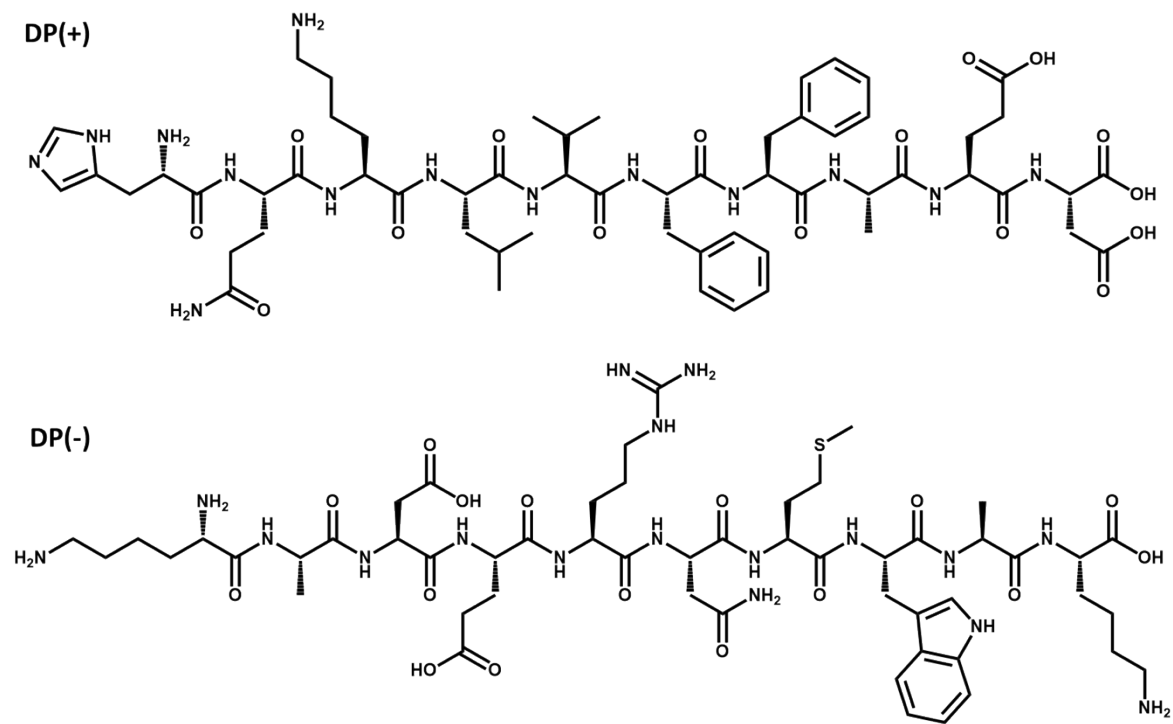

**Fig. S3** ESI Mass spectra of DPI, DPII, DPIII, and DPIV.

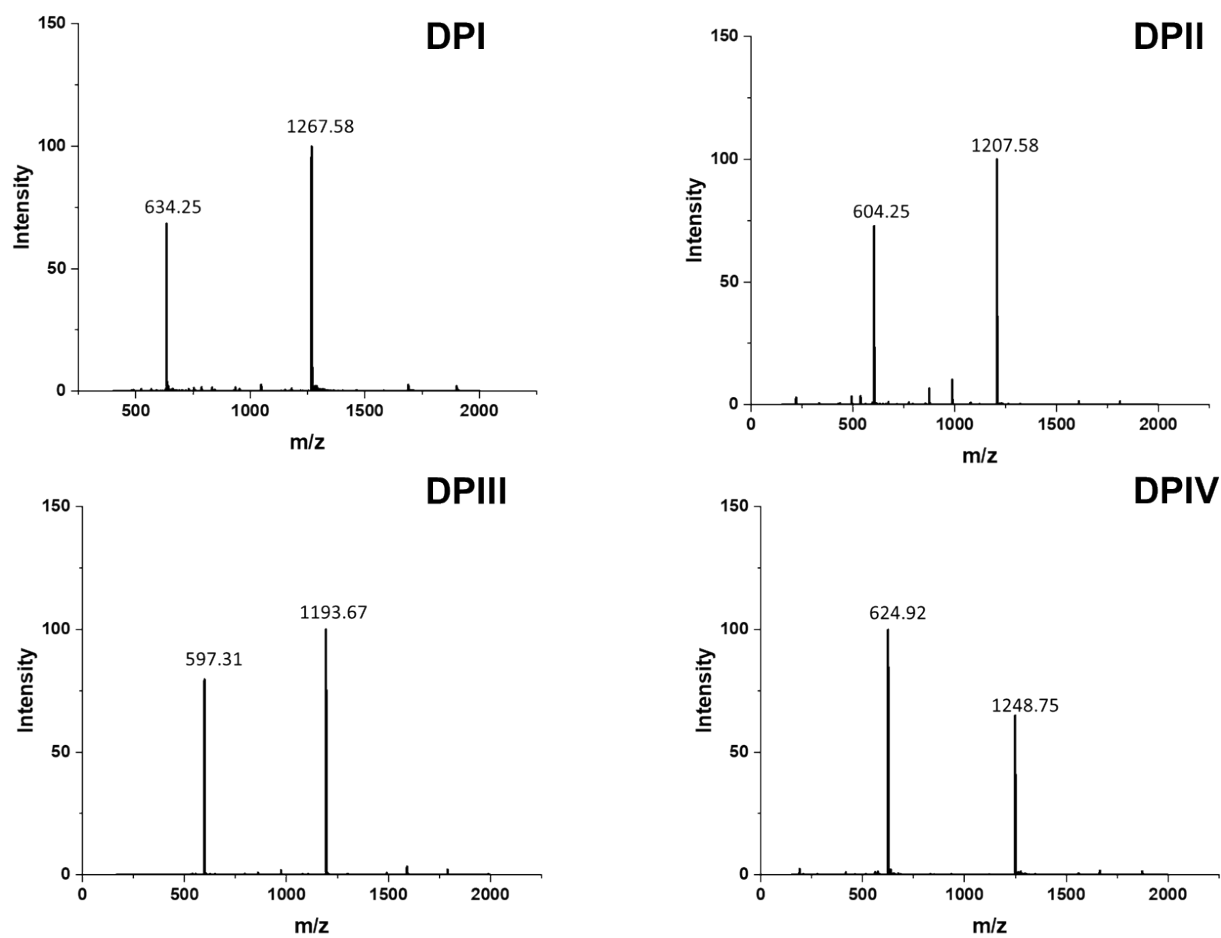

Supplement: d3sm00604b1.pdf [file d3sm00604b1.pdf]
